# Supplementary material for: Inhibition of NADPH Oxidases Prevents the Development of Osteoarthritis
Source: MDPI journal article supplement (doi:10.3390/antiox11122346), 2022-11-27

Supplementary Table S1. Primer list

| Gene    | Primer  | Primer sequences                      |
|---------|---------|---------------------------------------|
| NOX1    | forward | AGG TCG TGA TTA CCA AGG TTG TC        |
|         | reverse | AAG CCT CGC TTC CTC ATC TG            |
| NOX2    | forward | AGC TAT GAG GTG GTG ATG TTA GTG G     |
|         | reverse | CAC AAT ATT TGT ACC AGA CAG ACT TGA G |
| NOX3    | forward | ACC GTG GAG GAG GCA ATT AGA CAA       |
|         | reverse | TTC CAG GTT GAA GAA ATG CGC CAC       |
| NOX4    | forward | CCC AAG TTC CAA GCT CAT TTC C         |
|         | reverse | TGG TGA CAG GTT TGT TGC TCC T         |
| Vegf    | forward | GAG AGA GGC CGA AGT CCT TT            |
|         | reverse | TTG GAA CCG GCA TCT TTA TC            |
| Fth1    | forward | TGA CCA CGT GAC CAA CTT ACG           |
|         | reverse | CCA GGG TGT GCT TGT CAA AGA           |
| Hmox    | forward | TGA CCA CGT GAC CAA CTT ACG           |
|         | reverse | CCAGGGTGTGCTTGTCAAAGA                 |
| Txn     | forward | ATC AAG CCC TTC TTC CAT TCC           |
|         | reverse | TCC TGG CAG TCA TCC ACA TC            |
| Arg     | forward | ACA TCA ACA CTC CCC TGA CAA           |
|         | reverse | TAC GTC TCG CAA GCC AAT GTA           |
| Adamts5 | forward | CCA TCT TCC CGG TTG TGT ATC T         |
|         | reverse | ACT GTT TCA CTC TGG GCT CTT           |
| MMP13   | forward | GGA CTC ACT GTT GGT CCC TG            |
|         | reverse | GGA TTC CCG CAA GAG TCA CA            |
| Gapdh   | forward | AGC CCA AGA TGC CCT TCA GT            |
|         | reverse | CCG TGT TCC TAC CCC CAA TG            |

Supplementary Table S2. Antibody list

| Antibody                | Host   | Dilution | Application | Source                                            | Catalogue number |
|-------------------------|--------|----------|-------------|---------------------------------------------------|------------------|
| Adamts5                 | Rabbit | 1:1000   | IB          | Abcam,<br>Cambridge, UK                           | ab41037          |
| Akt                     | Rabbit | 1:1000   | IB          | Cell Signaling<br>Technology,<br>Beverly, MA, USA | #9272            |
| p-Akt                   | Rabbit | 1:1000   | IB          | Cell Signaling<br>Technology,<br>Beverly, MA, USA | #9271            |
| Aggrecan                | Rabbit | 1:1000   | IB          | Abcam,<br>Cambridge, UK                           | ab36861          |
| $\beta$ -actin          | Mouse  | 1:5000   | IB          | Sigma-Aldrich,<br>Burlington, MA, USA             | A1978            |
| I $\kappa$ B $\alpha$   | Mouse  | 1:1000   | IB          | Cell Signaling<br>Technology,<br>Beverly, MA, USA | #4814            |
| p-I $\kappa$ B $\alpha$ | Mouse  | 1:1000   | IB          | Cell Signaling<br>Technology,<br>Beverly, MA, USA | #9246            |

|                                    |        |              |         |                                                        |             |
|------------------------------------|--------|--------------|---------|--------------------------------------------------------|-------------|
| MMP13                              | Rabbit | 1:1000       | IB      | Abcam,<br>Cambridge, UK                                | ab51072     |
| NF-κB p65                          | Rabbit | 1:1000       | IB      | Cell Signaling<br>Technology,<br>Beverly, MA, USA      | #8242       |
| p-NF-κB p65                        | Rabbit | 1:1000       | IB      | Cell Signaling<br>Technology,<br>Beverly, MA, USA      | #3033       |
| p38 MAPK                           | Rabbit | 1:1000       | IB      | Cell Signaling<br>Technology,<br>Beverly, MA, USA      | #9212       |
| p-p38                              | Rabbit | 1:1000       | IB      | Cell Signaling<br>Technology,<br>Beverly, MA, USA      | #4631       |
| Stat3                              | Rabbit | 1:1000       | IB      | Cell Signaling<br>Technology,<br>Beverly, MA, USA      | #12640      |
| p-Stat3                            | Rabbit | 1:2000       | IB      | Cell Signaling<br>Technology,<br>Beverly, MA, USA      | #9145       |
| ERK                                | Mouse  | 1:5000       | IB      | BD Biosciences,<br>Franklin Lakes, New<br>Jersey , USA | 610123      |
| p-Erk                              | Rabbit | 1:1000       | IB      | Cell Signaling<br>Technology,<br>Beverly, MA, USA      | #9101       |
| Collagen II                        | Rabbit | 1:1000       | IB      | Abcam,<br>Cambridge, UK                                | ab34712     |
| JNK                                | Rabbit | 1:1000       | IB      | Cell Signaling<br>Technology,<br>Beverly, MA, USA      | #9252       |
| p-JNK                              | Rabbit | 1:1000       | IB      | Cell Signaling<br>Technology,<br>Beverly, MA, USA      | #9251       |
| 8-oxo-dG                           | Mouse  | 1:200        | IHC     | Santa Cruz<br>Biotechnology,<br>Santa Cruz, CA, USA    | sc-66036    |
| NOX1                               | Rabbit | 1:1000,1:200 | IB, IHC | Novusbiologicals,<br>Novus,<br>Briarwood Avenue, USA   | NBP1-31546  |
| NOX2                               | Mouse  | 1:1000,1:200 | IB, IHC | Invitrogen, Waltham,<br>Massachusetts, USA             | MA5-18052   |
| NOX3                               | Rabbit | 1:1000,1:200 | IB, IHC | Invitrogen, Waltham,<br>Massachusetts, USA             | # PA5-38036 |
| NOX4                               | Rabbit | 1:1000,1:200 | IB, IHC | Novusbiologicals,<br>Novus,<br>Briarwood Avenue, USA   | NB110-58849 |
| FITC-<br>conjugated<br>anti-rabbit | Donkey | 1:200        | IHC     | Jackson Immuno<br>Research<br>Laboratories             | 711-096-152 |
| Cy3-conjugated<br>anti-mouse       | Donkey | 1:200        | IHC     | Jackson Immuno<br>Research<br>Laboratories             | 715-165-151 |
| HRP-linked<br>anti-rabbit          | Donkey | 1:2000       | IB      | Cell Signaling<br>Technology,<br>Beverly, MA, USA      | 7074s       |
| HRP-linked<br>anti-mouse           | Donkey | 1:2000       | IB      | Cell Signaling<br>Technology,<br>Beverly, MA, USA      | 7076s       |

|                          |      |       |     |                                           |         |
|--------------------------|------|-------|-----|-------------------------------------------|---------|
| Biotinylated anti-mouse  | Goat | 1:200 | IHC | Vector, Laboratories, Burlingame, CA, USA | BA-2000 |
| Biotinylated anti-rabbit | Goat | 1:200 | IHC | Vector, Laboratories, Burlingame, CA, USA | BA-1000 |

IHC: immunohistochemistry; IB: immunoblot

Supplementary Table S3. The source data of Figure 2D. The positive cells for NOX isoform and DAPI positive cells were counted with Image J program, and the proportion of NOX positive cells were calculated.

#### Number of NOX positive cells

|   | NOX1 |    |    |    |    | NOX2 |    |    |    |    | NOX3 |    |    |    |    | NOX4 |    |    |    |    |
|---|------|----|----|----|----|------|----|----|----|----|------|----|----|----|----|------|----|----|----|----|
| 0 | 68   | 62 | 76 | 78 | 65 | 43   | 31 | 35 | 33 | 45 | 80   | 77 | 72 | 83 | 73 | 3    | 6  | 14 | 12 | 10 |
| 2 | 44   | 37 | 31 | 38 | 40 | 74   | 72 | 66 | 63 | 69 | 13   | 24 | 33 | 21 | 19 | 33   | 46 | 48 | 32 | 39 |
| 4 | 24   | 24 | 37 | 42 | 30 | 84   | 86 | 77 | 84 | 87 | 21   | 34 | 12 | 38 | 24 | 53   | 59 | 58 | 47 | 54 |
| 8 | 33   | 48 | 31 | 34 | 36 | 80   | 87 | 72 | 83 | 73 | 35   | 23 | 26 | 38 | 26 | 73   | 74 | 76 | 75 | 68 |

(Weeks)

#### Number of DAPI positive cells

|   | NOX1 |     |     |     |     | NOX2 |     |     |     |     | NOX3 |     |     |     |     | NOX4 |     |     |     |     |
|---|------|-----|-----|-----|-----|------|-----|-----|-----|-----|------|-----|-----|-----|-----|------|-----|-----|-----|-----|
| 0 | 213  | 245 | 215 | 211 | 200 | 214  | 227 | 214 | 224 | 213 | 219  | 231 | 229 | 213 | 202 | 221  | 208 | 245 | 215 | 215 |
| 2 | 211  | 235 | 206 | 209 | 224 | 250  | 205 | 203 | 210 | 208 | 240  | 221 | 209 | 232 | 236 | 227  | 250 | 249 | 240 | 222 |
| 4 | 214  | 238 | 232 | 222 | 227 | 217  | 237 | 244 | 245 | 205 | 216  | 200 | 250 | 248 | 245 | 201  | 232 | 206 | 244 | 201 |
| 8 | 217  | 212 | 208 | 211 | 228 | 217  | 205 | 204 | 232 | 218 | 249  | 237 | 247 | 231 | 210 | 214  | 235 | 246 | 224 | 241 |

(Weeks)

#### Number of positive cells (% of DAPI+)

|   | NOX1 |    |    |    |    | NOX2 |    |    |    |    | NOX3 |    |    |    |    | NOX4 |    |    |    |    |
|---|------|----|----|----|----|------|----|----|----|----|------|----|----|----|----|------|----|----|----|----|
| 0 | 68   | 62 | 76 | 78 | 65 | 43   | 31 | 35 | 33 | 45 | 80   | 77 | 72 | 83 | 73 | 3    | 6  | 14 | 12 | 10 |
| 2 | 44   | 37 | 31 | 38 | 40 | 74   | 72 | 66 | 63 | 69 | 13   | 24 | 33 | 21 | 19 | 33   | 46 | 48 | 32 | 39 |
| 4 | 24   | 24 | 37 | 42 | 30 | 84   | 86 | 77 | 84 | 87 | 21   | 34 | 12 | 38 | 24 | 53   | 59 | 58 | 47 | 54 |
| 8 | 33   | 48 | 31 | 34 | 36 | 80   | 87 | 72 | 83 | 73 | 35   | 23 | 26 | 38 | 26 | 73   | 74 | 76 | 75 | 68 |

(Weeks)

Supplementary Figure S1. Source data of Figure 3A and 3B

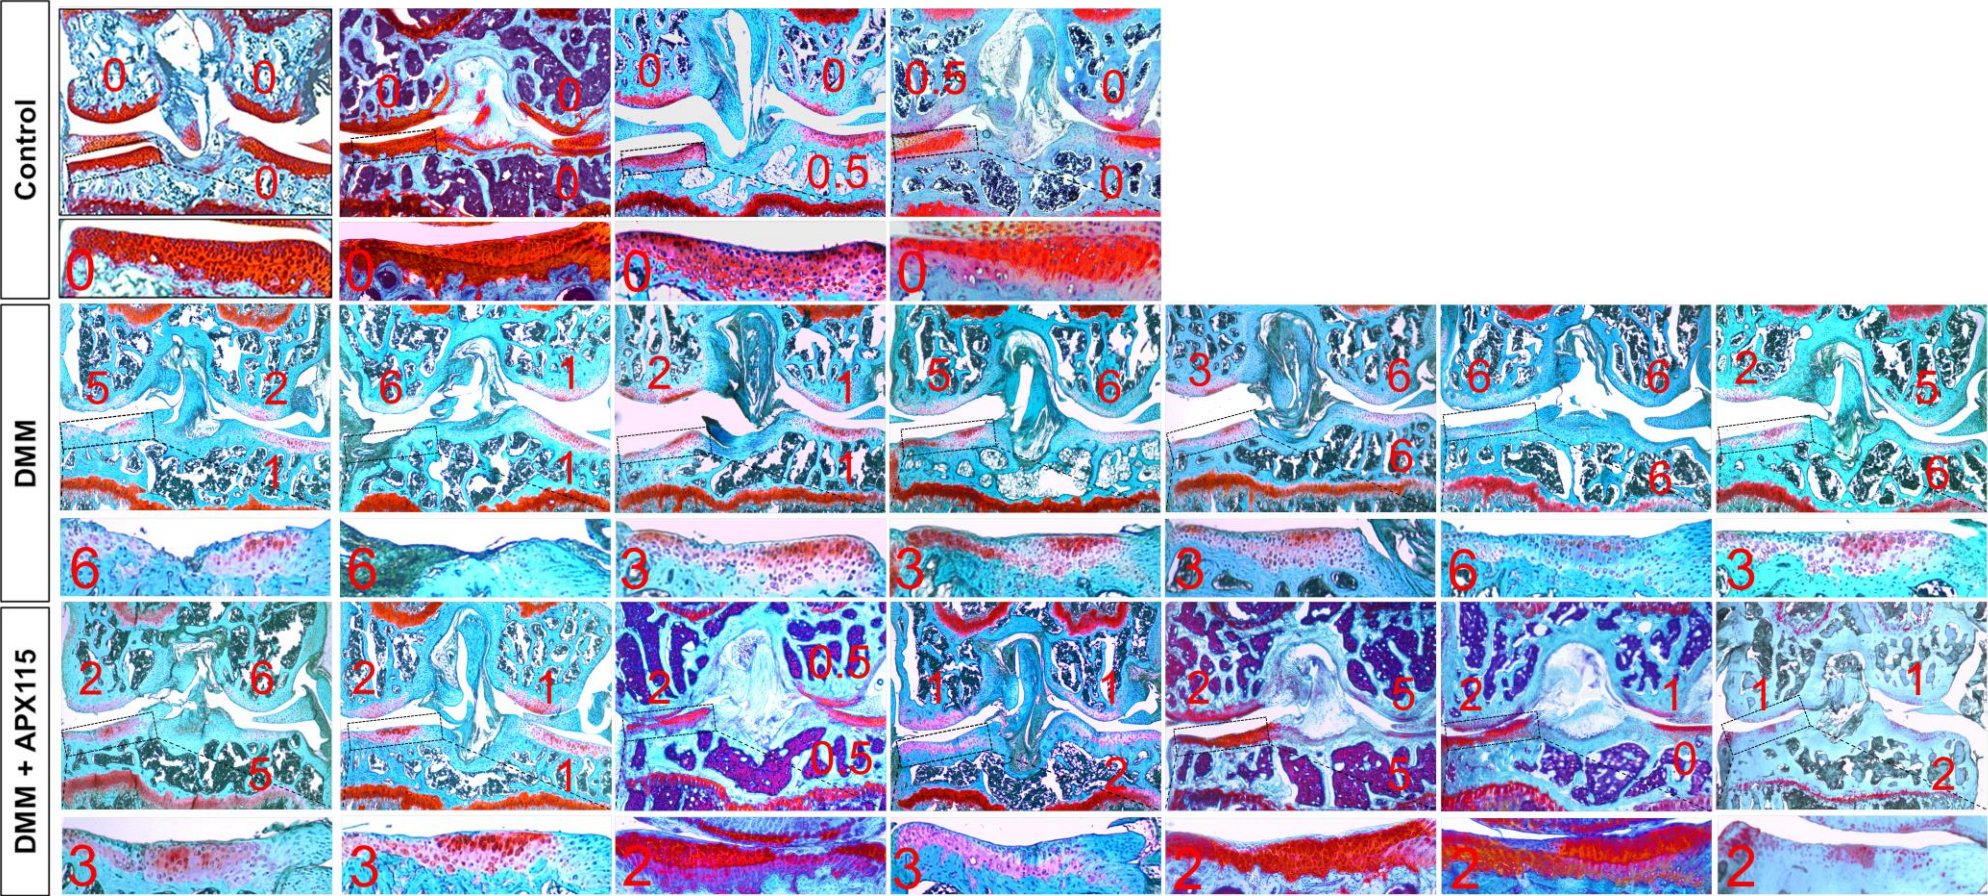

Supplement: s1 [file s1]
